# Supplementary material
Source: PubMed Central journal article supplement (PMC8648739)
Supplement: 41422_2021_561_MOESM3_ESM.pdf [file 41422_2021_561_MOESM3_ESM.pdf]

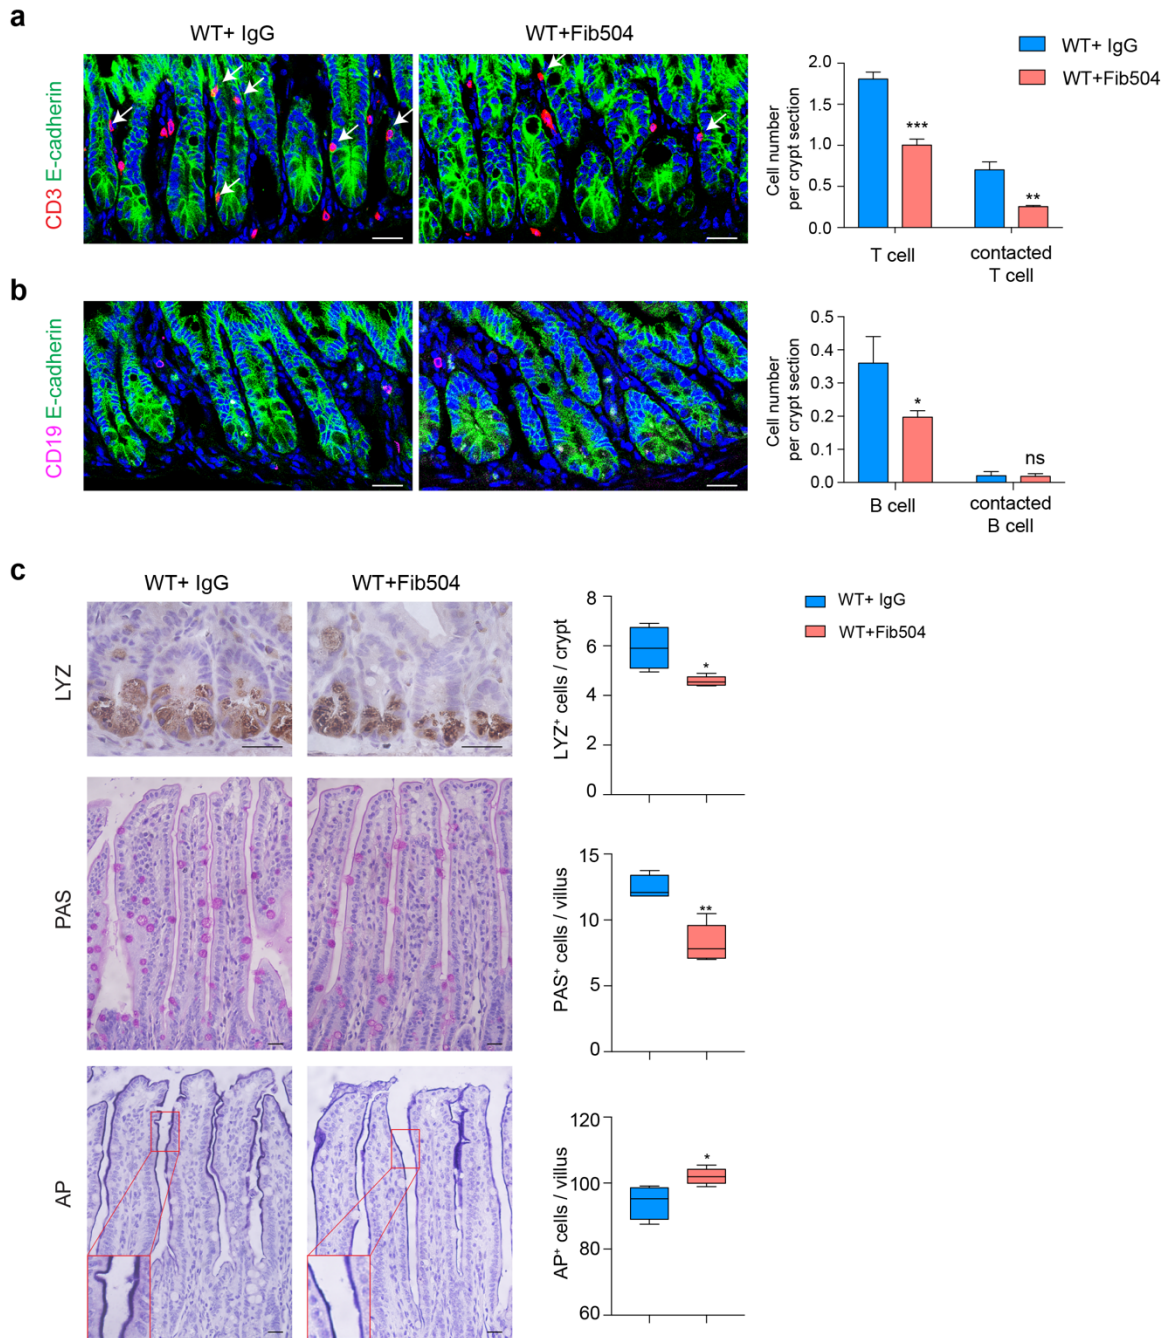

**Fig. S3 Integrin  $\beta 7$  blockade caused aberrant IEC differentiation in mice.** WT mice were treated with integrin  $\beta 7$  blocking mAb Fib504 or control IgG (200 $\mu$ g per mouse) every other day for two weeks. Then the mice were sacrificed, and the small intestines were assessed using immunohistochemical analysis. **a,b** Representative immunofluorescent images of CD3<sup>+</sup> T cells (**a**) and CD19<sup>+</sup> B cells (**b**) in the small intestinal crypts of antibody-

treated mice (left panel). Crypt epithelial cells were identified by E-cadherin (green), CD3<sup>+</sup> T cells (red), CD19<sup>+</sup> B cells (violet). The sections were counterstained with DAPI (blue). T cells in contact with crypt epithelial cells were highlighted with white arrows. Scale bars, 50  $\mu$ m. Quantification of total T or B cells and T or B cells in contact with crypt epithelial cells per crypt section (right panel). n = 4-5 mice, more than 5 fields per mouse. Data are represented as mean  $\pm$  SEM. \*\*\* $P < 0.001$ , \*\* $P < 0.01$ , \* $P < 0.05$ , ns, no significant difference, *t*-test. **c** Left: representative images of LYZ, PAS and AP staining of small intestine sections for IgG control or Fib504 treated WT mice. Scale bars, 50  $\mu$ m. Right: quantification of LYZ<sup>+</sup> Paneth cells, PAS<sup>+</sup> goblet cells and AP<sup>+</sup> enterocytes in each crypt or villus. n = 4-5 mice per group, more than 8 fields were analyzed per mouse. Data are represented as mean  $\pm$  SEM, \*\* $P < 0.01$ , \* $P < 0.05$ , *t*-test.
