# Supplementary material
Source: PubMed Central journal article supplement (PMC8648739)
Supplement: 41422_2021_561_MOESM4_ESM.pdf [file 41422_2021_561_MOESM4_ESM.pdf]

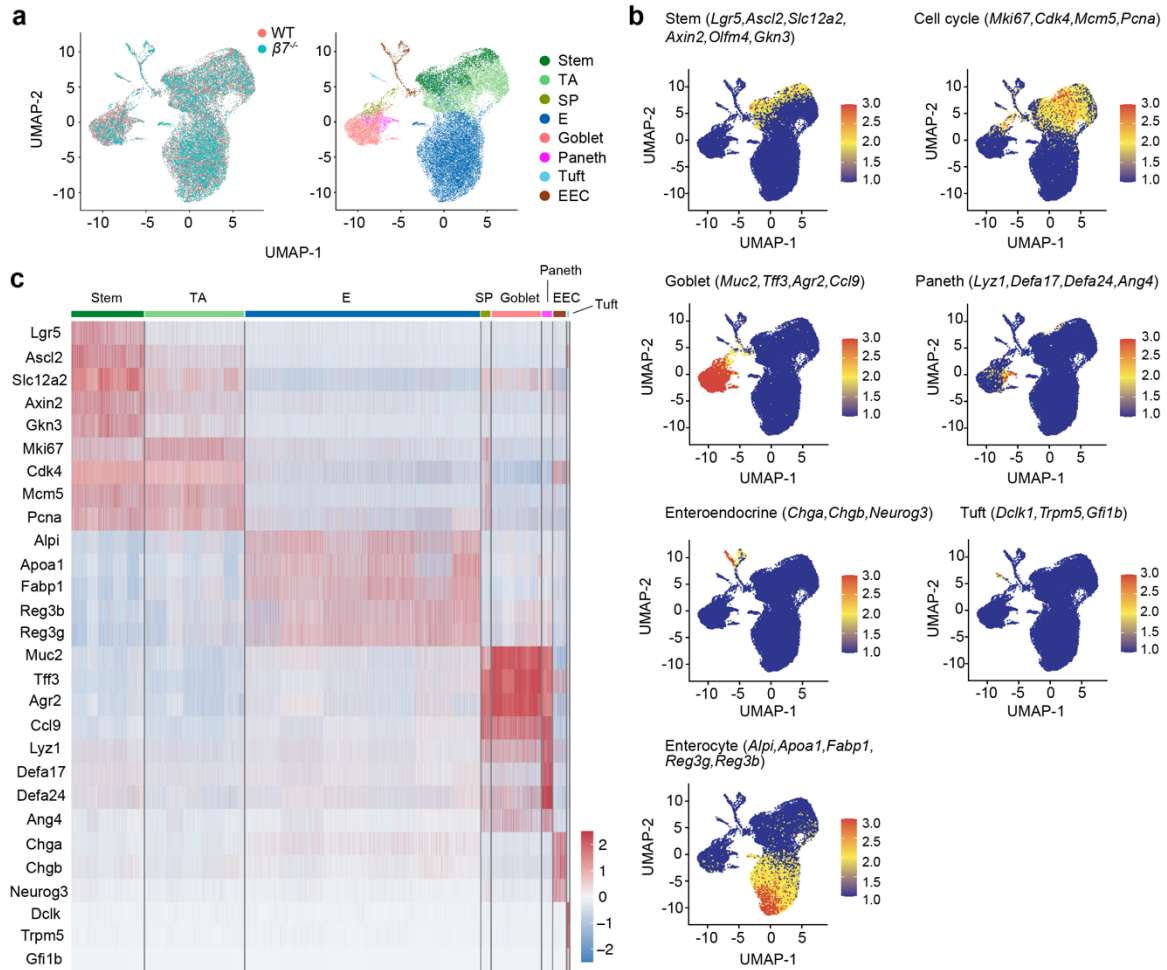

**Fig. S4 Analysis of scRNA-seq data. (related to Fig. 3)**

**a** Unsupervised clustering of scRNA-seq data of the enriched crypts isolated from WT and  $\beta 7^{-/-}$  mice. Left: UMAP plot of cells from WT mice (red) and  $\beta 7^{-/-}$  mice (green). Right: unsupervised clusters are overlaid on the UMAP plot and are labeled according to their identity (color coded) based on the expression of cell-type-specific marker genes. **b** UMAP plots of mean expression of known marker genes for the indicated cell type or state. **c** Heatmap shows the relative expression level (row-wise scaled gene expression, color scale) of cell-type specific genes in the indicated clusters. Color code marks the cell type.
