# Supplementary material
Source: PubMed Central journal article supplement (PMC8648739)
Supplement: 41422_2021_561_MOESM6_ESM.pdf [file 41422_2021_561_MOESM6_ESM.pdf]

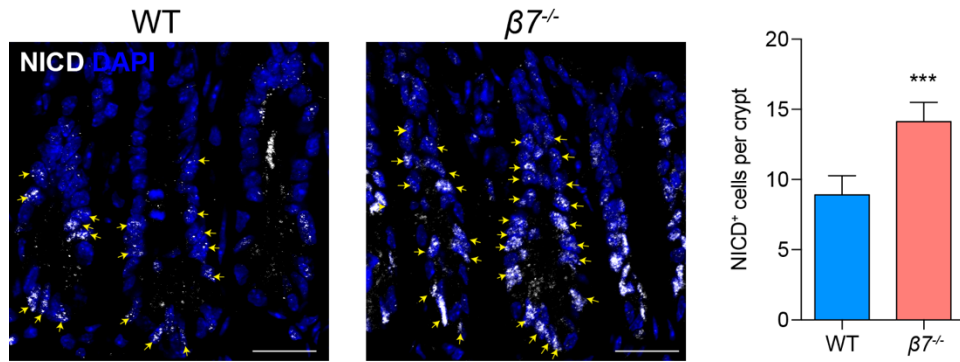

**Fig. S6 Increased NICD<sup>+</sup> cells in the crypts of  $\beta 7^{-/-}$  mice.**

Representative images (left) and quantification (right) of NICD staining of crypt sections from WT and  $\beta 7^{-/-}$  mice. NICD<sup>+</sup> cells are indicated by yellow arrows. NICD (white), DAPI (blue). Scale bars, 50  $\mu\text{m}$ .  $n = 5$  mice per group, more than 8 fields per mouse. Data are represented as mean  $\pm$  SEM, \*\*\* $P < 0.001$ ,  $t$ -test.
