# Supplementary material
Source: PubMed Central journal article supplement (PMC8648739)
Supplement: 41422_2021_561_MOESM7_ESM.pdf [file 41422_2021_561_MOESM7_ESM.pdf]

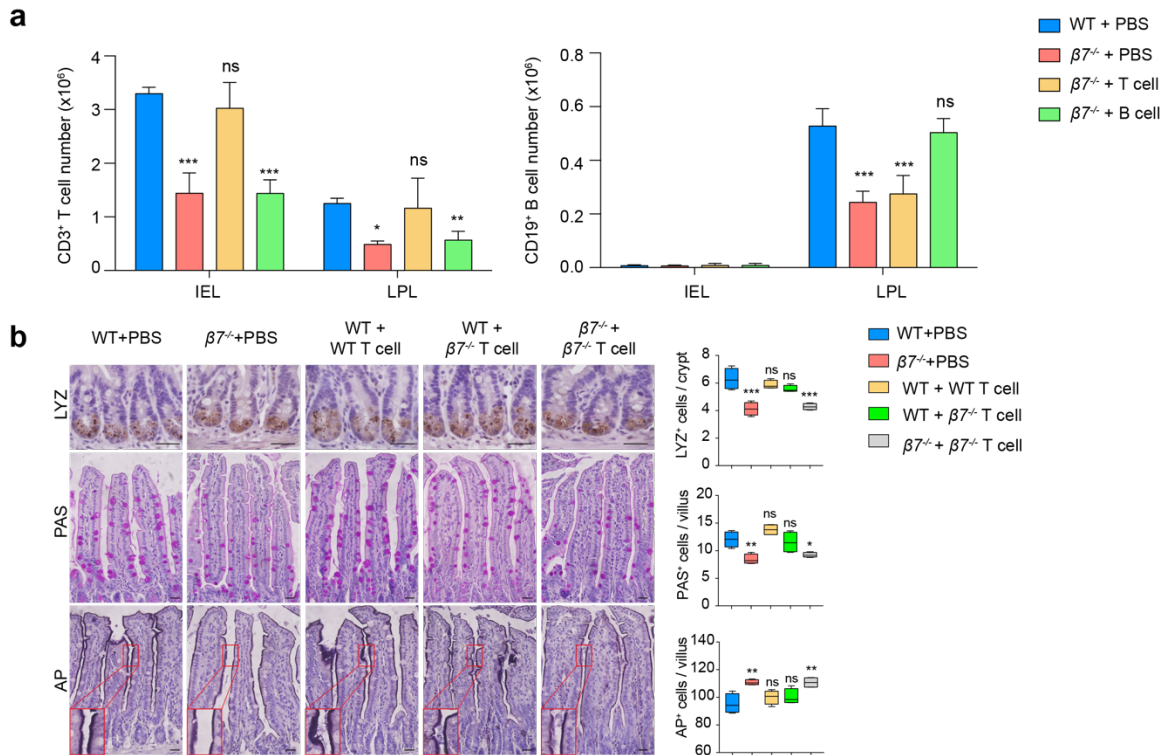

**Fig. S7 Adoptive lymphocyte transfer in WT and  $\beta 7^{-/-}$  mice (related to Fig. 5)**

**a** Quantification of T cells and B cells in the small intestine in mice 7 days after T or B cell transfer. Intraepithelial lymphocytes (IELs) and lamina propria lymphocytes (LPLs) were isolated from the small intestine and the number of CD3<sup>+</sup> T cells and CD19<sup>+</sup> B cells in IELs and LPLs were determined by flow cytometry. n = 6 mice per group. Data are represented as mean  $\pm$  SEM, \*\*\* $P$  < 0.001, \*\* $P$  < 0.01, \* $P$  < 0.05, ns, no significant difference, one-way ANOVA. **b** Left: representative images of LYZ, PAS and AP staining of small intestine sections for the indicated T cell transfer group. Scale bars, 50  $\mu$ m. Right: quantification of LYZ<sup>+</sup> Paneth cells, PAS<sup>+</sup> goblet cells and AP<sup>+</sup> enterocytes in each crypt or villus. n = 4 mice per group, more than 8 fields were analyzed per mouse. Data are represented as mean  $\pm$  SEM, \*\*\* $P$  < 0.001, \*\* $P$  < 0.01, \* $P$  < 0.05, ns, no significant difference, one-way ANOVA.
