# Supplementary material
Source: PubMed Central journal article supplement (PMC8648739)
Supplement: 41422_2021_561_MOESM8_ESM.pdf [file 41422_2021_561_MOESM8_ESM.pdf]

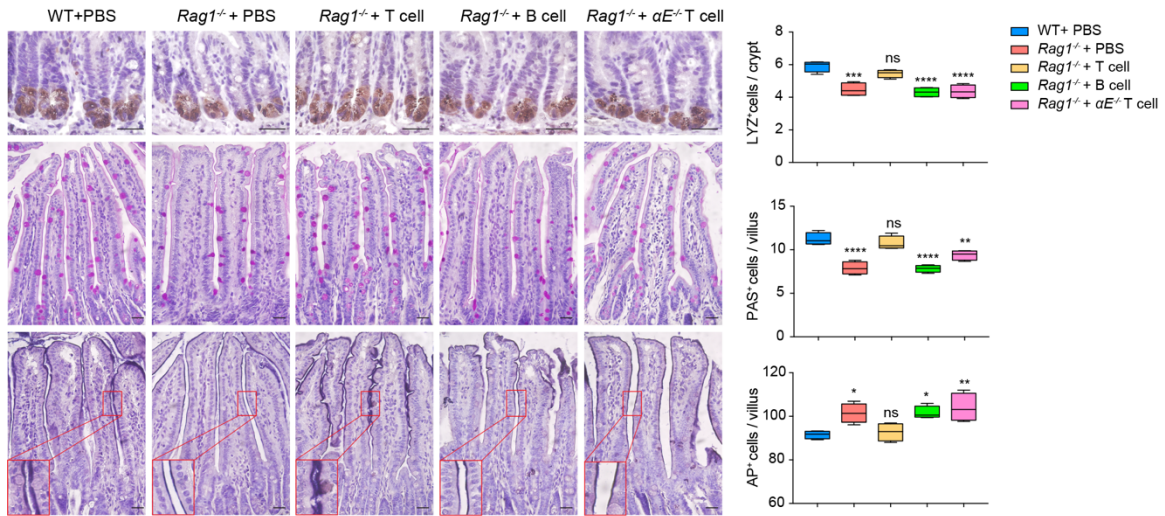

**Fig. S8 Adoptive lymphocyte transfer into *Rag1*<sup>-/-</sup> mice.**

Left: representative images of LYZ, PAS and AP staining of small intestine sections for the indicated mice. Scale bars, 50  $\mu$ m. Right: quantification of LYZ<sup>+</sup> Paneth cells, PAS<sup>+</sup> goblet cells and AP<sup>+</sup> enterocytes in each crypt or villus. n = 4 mice per group, more than 8 fields were analyzed per mouse. Data are represented as mean  $\pm$  SEM, \*\*\*\**P* < 0.0001, \*\*\**P* < 0.001, \*\**P* < 0.01, \**P* < 0.05, ns, no significant difference, one-way ANOVA.
