# Supplementary material
Source: PubMed Central journal article supplement (PMC8648739)
Supplement: 41422_2021_561_MOESM10_ESM.pdf [file 41422_2021_561_MOESM10_ESM.pdf]

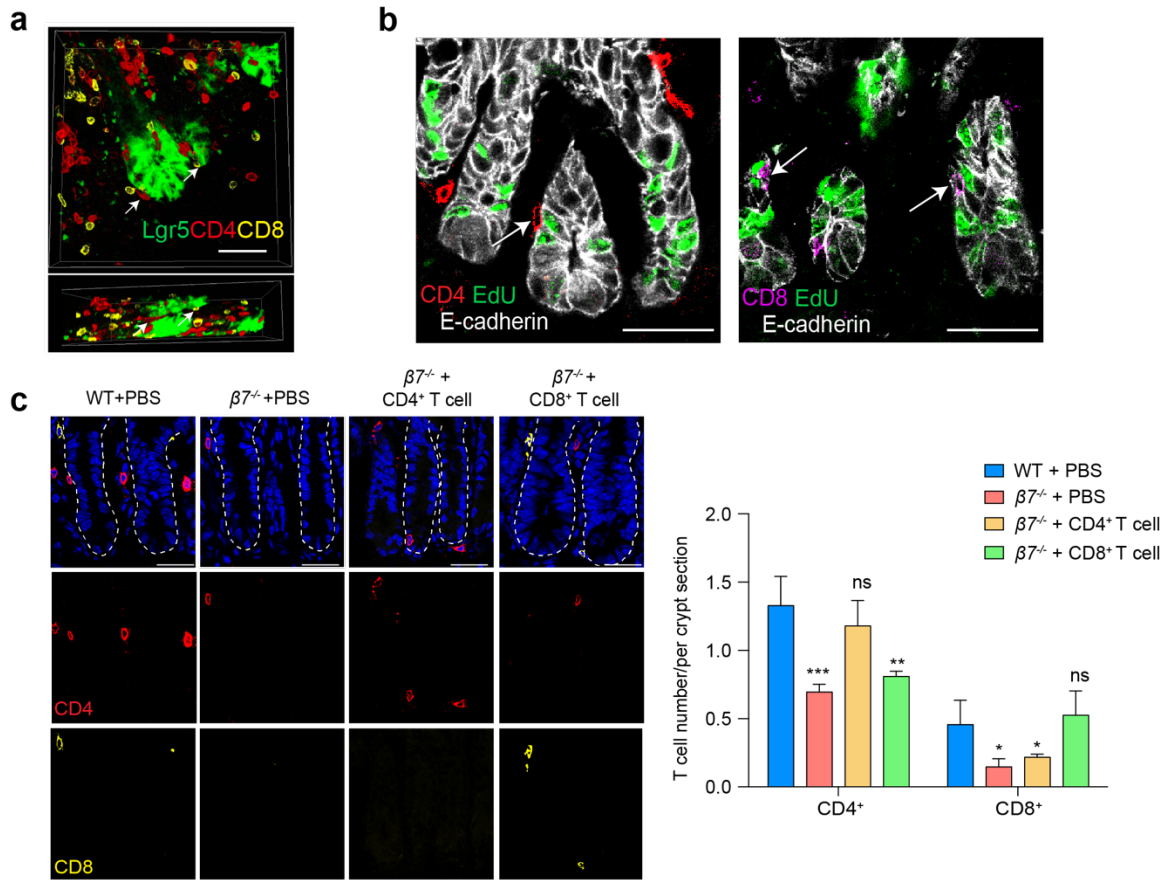

**Fig. S10 Both CD4<sup>+</sup> and CD8<sup>+</sup> T cells contact with the crypt IECs. (related to Fig. 5)**

**a** 3D reconstructed images of immunofluorescent staining for CD4<sup>+</sup> and CD8<sup>+</sup> T cells in the small intestinal crypts in *Lgr5-GFP* mice. CD4 (red), CD8 (yellow), *Lgr5* (green). Top: xy axis, bottom: zx axis. Representative CD4<sup>+</sup> and CD8<sup>+</sup> T cells in contact with *Lgr5*<sup>+</sup> ISC are indicated by the white arrows. **b** Representative images of CD4<sup>+</sup> (red, left) and CD8<sup>+</sup> (violet, right) T cells in contact with EdU<sup>+</sup> (green) crypt cells in the small intestine in WT mice. E-cadherin (white), scale bars, 50  $\mu$ m. **c** Left: representative images of CD4<sup>+</sup> (red) and CD8<sup>+</sup> (yellow) T cells in the crypts of each indicated group 7 days after CD4<sup>+</sup> or CD8<sup>+</sup> T cell transfer. DAPI (blue). Scale bars, 50  $\mu$ m. Right: quantification of CD4<sup>+</sup> and CD8<sup>+</sup> T cells per crypt section for each group, n = 6 mice per group, more than 8 fields per mouse. Data are represented as mean  $\pm$  SEM, \*\*\**P* < 0.001, \*\**P* < 0.01, \**P* < 0.05, ns, no significant difference, one-way ANOVA.
