# Supplementary material
Source: PubMed Central journal article supplement (PMC8648739)
Supplement: 41422_2021_561_MOESM11_ESM.pdf [file 41422_2021_561_MOESM11_ESM.pdf]

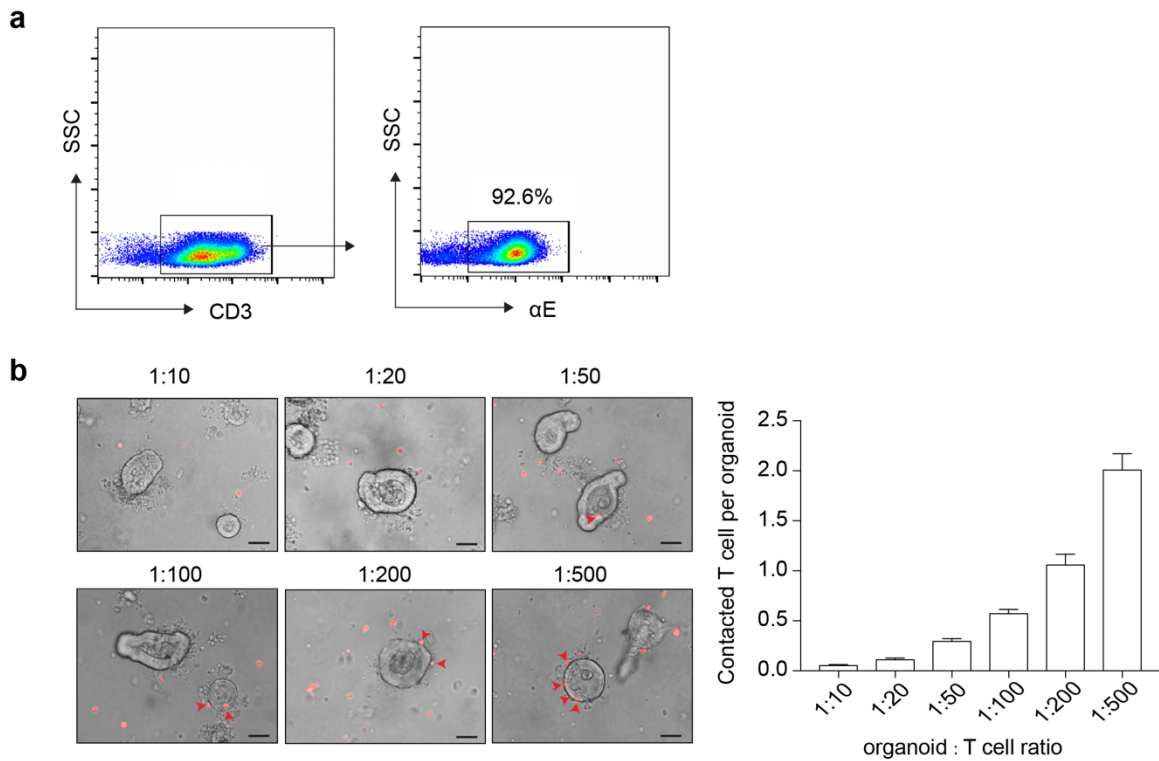

**Fig. S11 Co-culture of intestinal organoids and intestinal T cells. (related to Fig. 6)**

**a** FACS plots show the integrin  $\alpha E$  expression of the co-cultured T cells. **b** Intestinal organoids were mixed with T cells isolated from the small intestine of WT mice at indicated ratio and co-cultured in the Matrigel. Representative images of the co-cultured organoids and T cells (red) at Day1 were shown (left), red arrowheads indicate the T cells in contact with the organoid cells. Scale bars, 50  $\mu\text{m}$ . Graphs show the average number of contacted T cells per organoid (right), more than 8 fields for optical sections were analyzed under each condition and data are represented as mean  $\pm$  SEM.
