# Supplementary material
Source: PubMed Central journal article supplement (PMC8648739)
Supplement: 41422_2021_561_MOESM12_ESM.pdf [file 41422_2021_561_MOESM12_ESM.pdf]

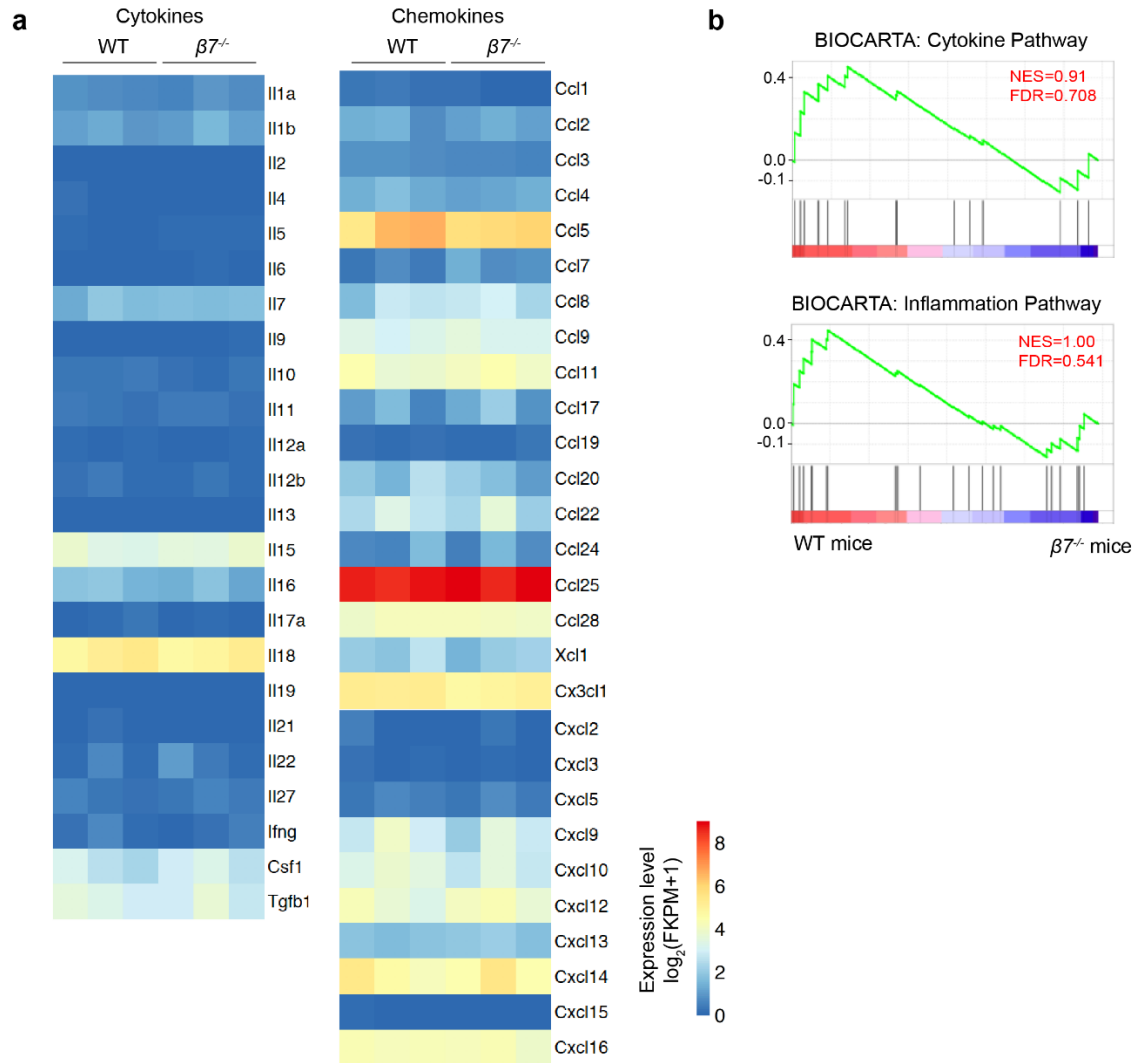

All these genes expression level  $P\text{-adj} > 0.05$

**Fig. S12 Expression of cytokines and chemokines was not significantly changed in the small intestine in  $\beta 7^{-/-}$  mice.**

**a** RNA-seq of the small intestine from WT (n = 3) and  $\beta 7^{-/-}$  (n = 3) mice. Heatmap shows the relative expression level (row-wise Z score of  $\log_2(\text{FKPM} + 1)$ , color bar) of cytokine and chemokine genes (rows) for each sample (columns). **b** Gene set enrichment analysis of cytokine (top) and inflammatory (bottom) pathways in ileums of WT and  $\beta 7^{-/-}$  mice. The green line shows the enrichment profile. The black bars show where genes from a given gene set are located (hit). NES, normalized enrichment score; FDR, false discovery rate. FDR < 0.25 was considered as statistically significant.
