# Supplementary material
Source: PubMed Central journal article supplement (PMC8648739)
Supplement: 41422_2021_561_MOESM13_ESM.pdf [file 41422_2021_561_MOESM13_ESM.pdf]

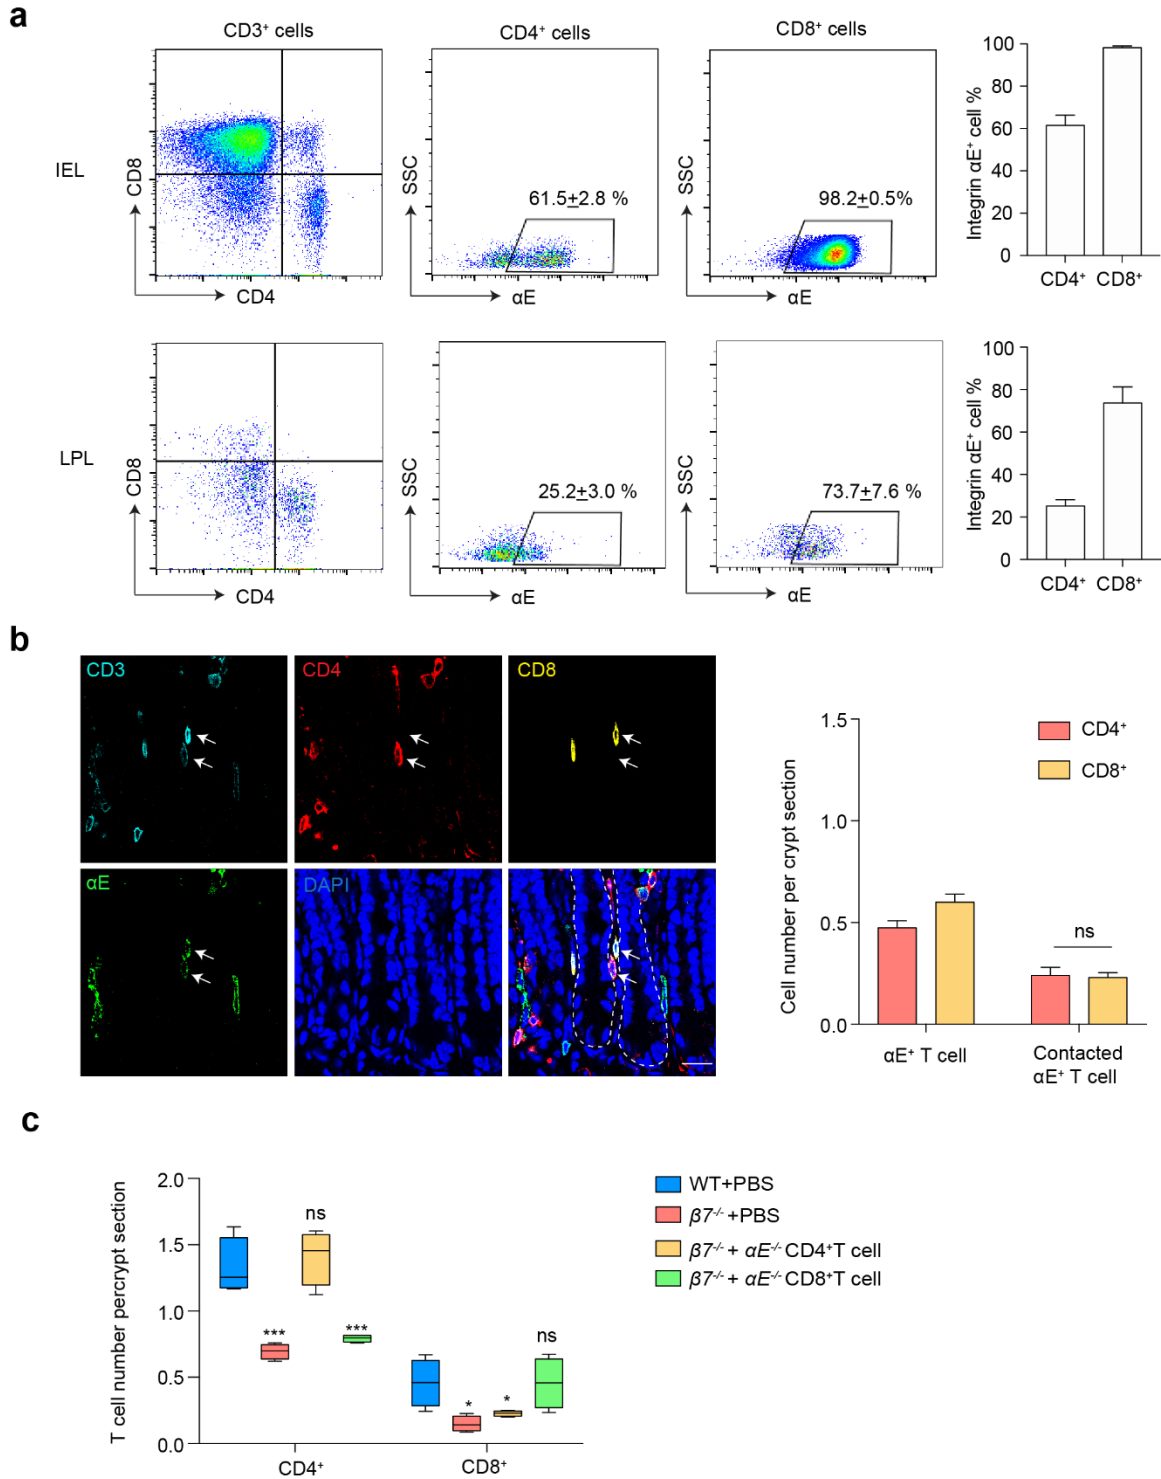

**Fig. S13** Integrin  $\alpha E$  expression in the intestinal T cells and the restoration of intestinal CD4<sup>+</sup> or CD8<sup>+</sup> T cell population in  $\beta 7^{-/-}$  mice by  $\alpha E^{-/-}$  T cell transfer. (related to Fig. 6)

**a** Percentages of integrin  $\alpha E^+$  cells gated on  $CD4^+$  and  $CD8^+$  T cells in the IELs and LPLs from WT mice ( $n = 3$ ). **b** Representative images (left) and quantification (right) of  $\alpha E^+$   $CD4^+$  and  $\alpha E^+$   $CD8^+$  T cells in the crypt region of WT mice.  $\alpha E$  (green), CD3 (indigo), CD4 (red), CD8 (yellow), DAPI (blue).  $\alpha E^+$   $CD4^+$  and  $\alpha E^+$   $CD8^+$  T cells in contact with crypt epithelial cells are highlighted with white arrows. Scale bars, 50  $\mu m$ .  $n = 3$  mice. Data are represented as mean  $\pm$  SEM. ns, no significant difference,  $t$ -test. **c** Quantification of  $CD4^+$  and  $CD8^+$  T cells per small intestinal crypt section for the indicated groups after  $\alpha E^{-/-}$  T cell ( $CD4^+$  or  $CD8^+$ ) transfer,  $n = 6$  mice per group, more than 8 fields per mouse. Data are represented as mean  $\pm$  SEM,  $***P < 0.001$ ,  $*P < 0.05$ , ns, no significant difference, one-way ANOVA.
