# Supplementary material
Source: PubMed Central journal article supplement (PMC8648739)
Supplement: 41422_2021_561_MOESM14_ESM.pdf [file 41422_2021_561_MOESM14_ESM.pdf]

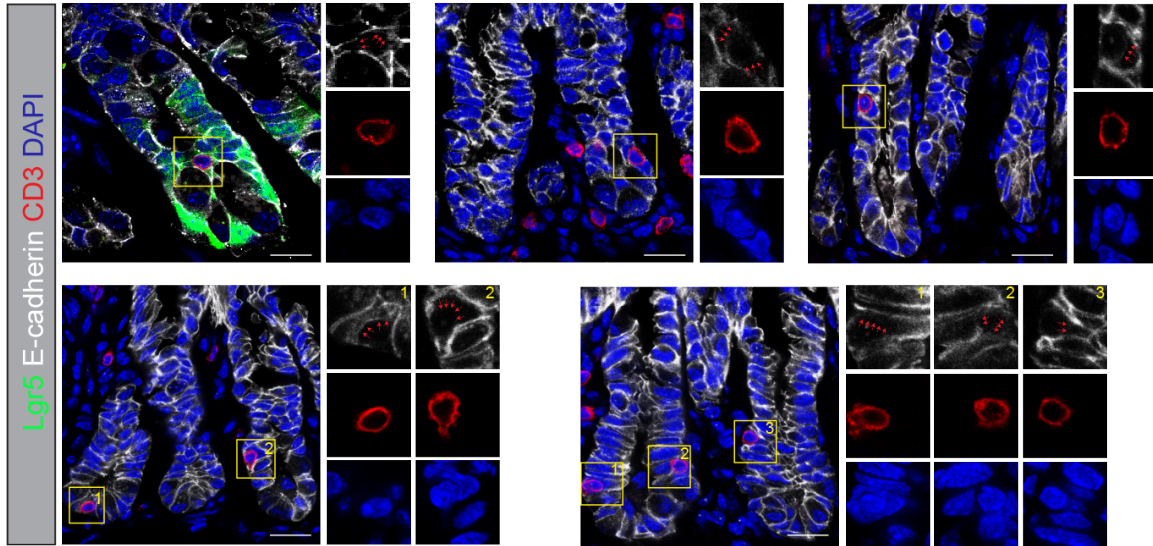

**Fig. S14 E-cadherin reduction on the plasma membrane of crypt epithelial cells in contact with T cells. (Related to Fig.7)**

Representative images of E-cadherin reduction on the plasma membrane of crypt epithelial cells contacted with T cells. Lgr5 (green), CD3 (red), E-cadherin (white), DAPI (blue). Red arrows indicate the contact interface between epithelial cell and T cell. Scale bars, 25  $\mu$ m.
