# Supplementary material
Source: PubMed Central journal article supplement (PMC8648739)
Supplement: 41422_2021_561_MOESM15_ESM.pdf [file 41422_2021_561_MOESM15_ESM.pdf]

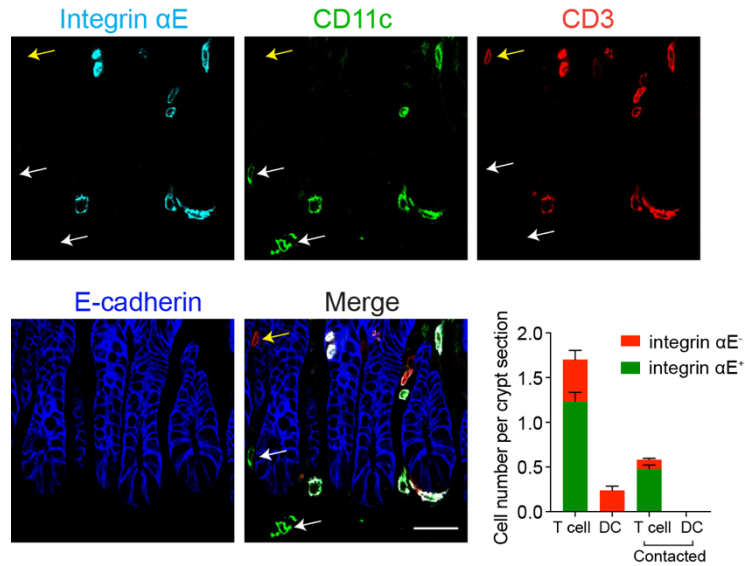

**Fig. S15 Integrin  $\alpha E$  expression in T cells and dendritic cells in the crypt region.**

Representative images and quantification of integrin  $\alpha E^+$  and  $\alpha E^-$  T cells ( $CD3^+$ ) and dendritic cells ( $CD3^-CD11c^+$ ) in the crypt region of WT mice.  $\alpha E$  (indigo), CD11c (green), CD3 (red), E-cadherin (blue). The  $\alpha E^-$  T cell was highlighted by yellow arrow and  $\alpha E^-$  dendritic cells were highlighted by white arrows.  $n = 3$  mice, more than 4 fields per mouse. Data are represented as mean  $\pm$  SEM. Scale bars, 50  $\mu m$ .
