# Supplementary material
Source: PubMed Central journal article supplement (PMC8648739)
Supplement: 41422_2021_561_MOESM16_ESM.pdf [file 41422_2021_561_MOESM16_ESM.pdf]

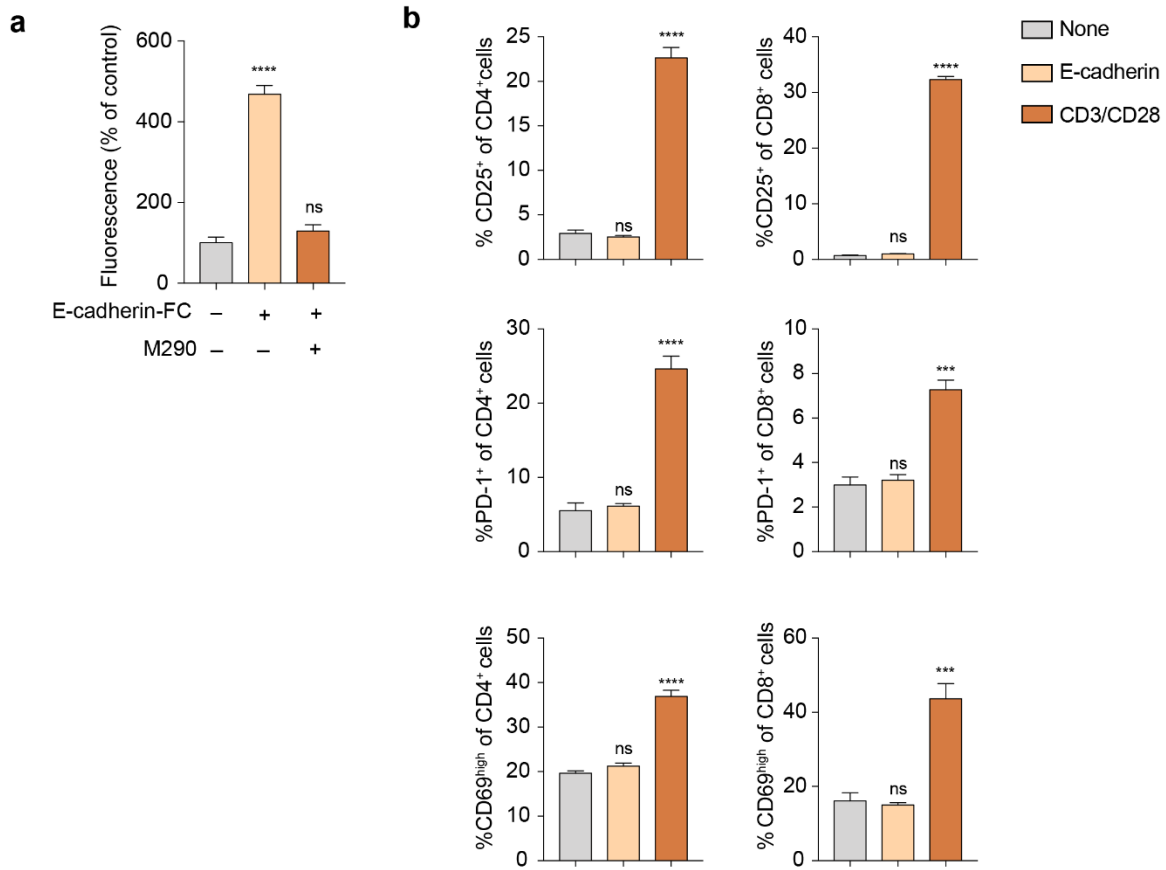

**Fig. S16 Binding of E-cadherin to integrin  $\alpha E\beta 7$  did not activate intestinal T cells.**

**a** Adhesion of intestinal T cells from WT mice to the immobilized E-cadherin-Fc substrates. Microtiter plate wells were coated with 40  $\mu\text{g/ml}$  of mouse E-cadherin-Fc. 1% BSA was used as a negative control.  $\alpha E\beta 7$ -E-cadherin binding was inhibited by pre-treatment of cells with 10  $\mu\text{g/ml}$   $\alpha E$  blocking mAb M290. Data are represented as mean  $\pm$  SEM for triplicate samples, \*\*\*\* $P < 0.0001$ , ns, no significant difference, one-way ANOVA. **b** Intestinal T cells were plated on the immobilized E-cadherin-Fc (40  $\mu\text{g/ml}$ ) or anti-CD3/CD28 mAbs (1  $\mu\text{g/ml}$ ) as positive control and cultured for 48h. The activation phenotype of CD4<sup>+</sup> (left) and CD8<sup>+</sup> (right) T cells was determined by the percentage of CD25<sup>+</sup>, PD-1<sup>+</sup> and high expression of CD69<sup>+</sup> cells using flow cytometry, respectively. Data are represented as mean  $\pm$  SEM for triplicate samples. \*\*\*\* $P < 0.0001$ , \*\*\* $P < 0.001$ , ns, no significant difference, one-way ANOVA.
